# Supplementary material for: Exploring the Biofilm Formation Capacity in S. pseudintermedius and Coagulase-Negative Staphylococci Species
Source: MDPI journal article supplement (doi:10.3390/pathogens11060689), 2022-06-16
Supplement: s1 [file s1]

**Table S1** - Characteristics of the *S. pseudintermedius* and CoNS isolated from pets, livestock and wild animals.

| Isolate | Animal    | Staphylococci species                   | Infection/colonization | Resistance                            |                                                               | Virulence factors |
|---------|-----------|-----------------------------------------|------------------------|---------------------------------------|---------------------------------------------------------------|-------------------|
|         |           |                                         |                        | Phenotype                             | Genotype                                                      |                   |
| VS2733  | Wild hare | <i>S. cohnii</i> spp <i>urealyticus</i> | Colonization           | PEN-FOX-ERY                           | <i>blaZ, ermA, ermB</i>                                       | -                 |
| VS2734  | Wild hare | <i>S. lentus</i>                        | Colonization           | Susceptible                           | <i>Susceptible</i>                                            | -                 |
| VS2735  | Wild hare | <i>S. vitulinus</i>                     | Colonization           | Susceptible                           | <i>Susceptible</i>                                            | -                 |
| VS2736  | Wild hare | <i>S. vitulinus</i>                     | Colonization           | Susceptible                           | <i>Susceptible</i>                                            | -                 |
| VS2737  | Wild hare | <i>S. sciuri</i>                        | Colonization           | PEN                                   | <i>blaZ</i>                                                   | -                 |
| VS2738  | Wild hare | <i>S. sciuri</i>                        | Colonization           | PEN                                   | -                                                             | -                 |
| VS2739  | Wild hare | <i>S. sciuri</i>                        | Colonization           | PEN                                   | -                                                             | -                 |
| VS2740  | Wild hare | <i>S. sciuri</i>                        | Colonization           | PEN                                   | -                                                             | -                 |
| VS2741  | Wild hare | <i>S. sciuri</i>                        | Colonization           | PEN                                   | -                                                             | -                 |
| VS2742  | Wild hare | <i>S. sciuri</i>                        | Colonization           | PEN                                   | -                                                             | -                 |
| VS2743  | Wild hare | <i>S. sciuri</i>                        | Colonization           | PEN                                   | -                                                             | -                 |
| VS2744  | Wild hare | <i>S. sciuri</i>                        | Colonization           | PEN                                   | -                                                             | -                 |
| VS2777  | Dog       | <i>S. pseudintermedius</i>              | Infection (pyoderma)   | PEN                                   | <i>blaZ</i>                                                   | -                 |
| VS2778  | Dog       | <i>S. pseudintermedius</i>              | Infection (pyoderma)   | PEN-CIP-CN-TOB-KAN-STR-ERY-CD-TET-SXT | <i>blaZ, ermB, aph(3')-IIIa</i>                               | -                 |
| VS2779  | Dog       | <i>S. pseudintermedius</i>              | Infection (pyoderma)   | PEN-KAN-STR-ERY-CD-TET-CHL            | <i>blaZ, ermB, aph(3')-IIIa, tetM</i>                         | -                 |
| VS2780  | Dog       | <i>S. pseudintermedius</i>              | Infection (pyoderma)   | PEN-CIP-CN-TOB-KAN-STR-ERY-CD-TET-SXT | <i>blaZ, ermB, aac(6')-Ie-aph(2'')-Ia, aph(3')-IIIa, tetM</i> | -                 |

|        |     |                            |                         |                                                   |                                                                                                                                 |   |
|--------|-----|----------------------------|-------------------------|---------------------------------------------------|---------------------------------------------------------------------------------------------------------------------------------|---|
| VS2781 | Dog | <i>S. pseudintermedius</i> | Infection<br>(pyoderma) | PEN-CN-TOB-KAN-STR-<br>ERY-CD-TET-SXT             | <i>blaZ</i> , <i>ermB</i> , <i>aac</i> (6')-Ie- <i>aph</i> (2'')-<br>Ia, <i>tetM</i>                                            | - |
| VS2782 | Dog | <i>S. pseudintermedius</i> | Infection<br>(pyoderma) | PEN-KAN-STR-ERY-CD-<br>TET-SXT                    | <i>blaZ</i> , <i>ermB</i> , <i>aph</i> (3')-IIIa, <i>tetM</i>                                                                   | - |
| VS2783 | Dog | <i>S. pseudintermedius</i> | Infection<br>(pyoderma) | PEN-CIP-CN-TOB-KAN-<br>STR-ERY-CD-TET-CHL-<br>SXT | <i>blaZ</i> , <i>msr</i> (A/B), <i>aph</i> (3')-IIIa,<br><i>aac</i> (6')-Ie- <i>aph</i> (2'')-Ia, <i>tetM</i>                   | - |
| VS2784 | Dog | <i>S. pseudintermedius</i> | Infection<br>(pyoderma) | PEN-CIP-CN-TOB-KAN-<br>STR-ERY-CD-SXT             | <i>blaZ</i> , <i>ermB</i> , <i>aac</i> (6')-Ie- <i>aph</i> (2'')-<br>Ia, <i>aph</i> (3')-IIIa                                   | - |
| VS2785 | Dog | <i>S. pseudintermedius</i> | Infection<br>(pyoderma) | PEN-CIP-KAN-STR-ERY-<br>CD-TET-CHL-SXT            | <i>blaZ</i> , <i>ermB</i> , <i>tetM</i>                                                                                         | - |
| VS2786 | Dog | <i>S. pseudintermedius</i> | Infection<br>(pyoderma) | PEN-CIP-CN-TOB-KAN-<br>STR-ERY-CD-TET-SXT         | <i>blaZ</i> , <i>ermB</i> , <i>aph</i> (3')-IIIa, <i>tetM</i>                                                                   | - |
| VS2787 | Dog | <i>S. pseudintermedius</i> | Infection<br>(pyoderma) | PEN-CIP-KAN-STR-ERY-<br>CD-SXT-RD                 | <i>blaZ</i> , <i>ermB</i> , <i>aph</i> (3')-IIIa                                                                                | - |
| VS2788 | Dog | <i>S. pseudintermedius</i> | Infection<br>(pyoderma) | PEN-CIP-KAN-STR-ERY-<br>CD-SXT-RD                 | <i>blaZ</i> , <i>ermB</i> , <i>aph</i> (3')-IIIa                                                                                | - |
| VS2789 | Dog | <i>S. pseudintermedius</i> | Infection<br>(pyoderma) | PEN-CIP-CN-TOB-KAN-<br>STR-ERY-CD-TET-SXT         | <i>blaZ</i> , <i>ermB</i> , <i>msr</i> (A/B), <i>aph</i> (3')-<br>IIIa, <i>tetM</i>                                             | - |
| VS2790 | Dog | <i>S. pseudintermedius</i> | Infection<br>(pyoderma) | PEN-CIP-CN-TOB-KAN-<br>STR-ERY-CD-TET-CHL-<br>SXT | <i>blaZ</i> , <i>ermB</i> , <i>aac</i> (6')-Ie- <i>aph</i> (2'')-<br>Ia, <i>aph</i> (3')-IIIa, <i>tetM</i>                      | - |
| VS2791 | Dog | <i>S. pseudintermedius</i> | Infection<br>(pyoderma) | PEN-CIP-CN-TOB-KAN-<br>STR-ERY-CD-TET-CHL-<br>SXT | <i>blaZ</i> , <i>ermB</i> , <i>msr</i> (A/B), <i>aac</i> (6')-<br>Ie- <i>aph</i> (2'')-Ia, <i>aph</i> (3')-IIIa,<br><i>tetM</i> | - |
| VS2792 | Dog | <i>S. pseudintermedius</i> | Infection<br>(pyoderma) | PEN-CIP-CN-TOB-KAN-<br>STR-ERY-CD-TET-SXT         | <i>blaZ</i> , <i>ermB</i> , <i>aac</i> (6')-Ie- <i>aph</i> (2'')-<br>Ia, <i>aph</i> (3')-IIIa, <i>tetM</i>                      | - |
| VS2793 | Dog | <i>S. pseudintermedius</i> | Infection<br>(pyoderma) | PEN-CIP-CN-TOB-KAN-<br>STR-ERY-CD-TET-SXT         | <i>blaZ</i> , <i>ermB</i> , <i>aac</i> (6')-Ie- <i>aph</i> (2'')-<br>Ia, <i>aph</i> (3')-IIIa, <i>tetM</i>                      | - |
| VS2794 | Dog | <i>S. pseudintermedius</i> | Infection<br>(pyoderma) | PEN-CIP-CN-TOB-KAN-<br>STR-ERY-CD-TET-SXT         | <i>blaZ</i> , <i>ermB</i> , <i>aac</i> (6')-Ie- <i>aph</i> (2'')-<br>Ia, <i>aph</i> (3')-IIIa                                   | - |

|        |     |                            |                         |                                                   |                                                                                                                 |                               |
|--------|-----|----------------------------|-------------------------|---------------------------------------------------|-----------------------------------------------------------------------------------------------------------------|-------------------------------|
| VS2795 | Dog | <i>S. pseudintermedius</i> | Infection<br>(pyoderma) | PEN-CIP-CN-TOB-KAN-<br>STR-ERY-CD-TET-SXT         | <i>blaZ</i> , <i>ermB</i> , <i>aac</i> (6′)-Ie- <i>aph</i> (2′′)-<br>Ia, <i>aph</i> (3′)-IIIa, <i>tetM</i>      | -                             |
| VS2796 | Dog | <i>S. pseudintermedius</i> | Infection<br>(pyoderma) | PEN-CIP-CN-TOB-KAN-<br>STR-ERY-CD-TET-CHL-<br>SXT | <i>blaZ</i> , <i>ermB</i> , <i>aac</i> (6′)-Ie- <i>aph</i> (2′′)-<br>Ia, <i>aph</i> (3′)-IIIa, <i>tetM</i>      | -                             |
| VS2797 | Dog | <i>S. pseudintermedius</i> | Infection<br>(pyoderma) | PEN-CN-TOB-KAN-STR-<br>ERY-CD-TET-SXT-RD          | <i>blaZ</i> , <i>ermB</i> , <i>aph</i> (3′)-IIIa                                                                | -                             |
| VS2798 | Dog | <i>S. pseudintermedius</i> | Infection<br>(pyoderma) | PEN-CIP-CN-TOB-KAN-<br>STR-ERY-CD-FD-SXT          | <i>blaZ</i> , <i>ermB</i> , <i>aac</i> (6′)-Ie- <i>aph</i> (2′′)-<br>Ia, <i>aph</i> (3′)-IIIa                   | -                             |
| VS2799 | Dog | <i>S. pseudintermedius</i> | Infection<br>(pyoderma) | PEN-CN-KAN-ERY-CD-<br>TET-SXT                     | <i>blaZ</i> , <i>ermB</i> , <i>msr</i> (A/B), <i>aac</i> (6′)-<br>Ie- <i>aph</i> (2′′)-Ia, <i>aph</i> (3′)-IIIa | -                             |
| VS2800 | Dog | <i>S. pseudintermedius</i> | Infection<br>(pyoderma) | PEN-CIP-CN-TOB-KAN-<br>STR-ERY-CD-TET-SXT         | <i>blaZ</i> , <i>ermB</i> , <i>msr</i> (A/B), <i>aac</i> (6′)-<br>Ie- <i>aph</i> (2′′)-Ia, <i>aph</i> (3′)-IIIa | -                             |
| VS2801 | Dog | <i>S. pseudintermedius</i> | Infection<br>(pyoderma) | PEN-CIP-CN-TOB-KAN-<br>STR-ERY-CD-TET-SXT         | <i>blaZ</i> , <i>ermB</i> , <i>msr</i> (A/B), <i>aac</i> (6′)-<br>Ie- <i>aph</i> (2′′)-Ia, <i>aph</i> (3′)-IIIa | -                             |
| VS2802 | Dog | <i>S. pseudintermedius</i> | Infection<br>(pyoderma) | PEN-CIP-CN-TOB-KAN-<br>STR-ERY-CD-TET-SXT         | <i>blaZ</i> , <i>ermB</i> , <i>aac</i> (6′)-Ie- <i>aph</i> (2′′)-<br>Ia, <i>aph</i> (3′)-IIIa, <i>tetM</i>      | -                             |
| VS2803 | Dog | <i>S. pseudintermedius</i> | Infection<br>(pyoderma) | PEN-CIP-CN-TOB-KAN-<br>STR-ERY-CD-TET-SXT         | <i>blaZ</i> , <i>ermB</i> , <i>aac</i> (6′)-Ie- <i>aph</i> (2′′)-<br>Ia, <i>aph</i> (3′)-IIIa                   | -                             |
| VS2804 | Dog | <i>S. pseudintermedius</i> | Infection<br>(pyoderma) | PEN-CN-TOB-KAN-STR-<br>ERY-CD-TET-SXT             | <i>blaZ</i> , <i>ermB</i> , <i>msr</i> (A/B), <i>aph</i> (3′)-<br>IIIa                                          | -                             |
| VS2805 | Dog | <i>S. pseudintermedius</i> | Infection<br>(pyoderma) | PEN-CIP-CN-TOB-KAN-<br>STR-ERY-CD-TET-SXT         | <i>ermB</i> , <i>msr</i> (A/B), <i>aac</i> (6′)-Ie-<br><i>aph</i> (2′′)-Ia, <i>aph</i> (3′)-IIIa                | -                             |
| VS2806 | Dog | <i>S. pseudintermedius</i> | Infection<br>(pyoderma) | PEN-CIP-CN-TOB-KAN-<br>STR-ERY-CD-TET-SXT         | <i>blaZ</i> , <i>ermB</i> , <i>aac</i> (6′)-Ie- <i>aph</i> (2′′)-<br>Ia, <i>aph</i> (3′)-IIIa, <i>tetM</i>      | -                             |
| VS2807 | Dog | <i>S. pseudintermedius</i> | Infection<br>(pyoderma) | PEN-CIP-CN-TOB-KAN-<br>STR-ERY-CD-TET-SXT         | <i>blaZ</i> , <i>ermB</i> , <i>aac</i> (6′)-Ie- <i>aph</i> (2′′)-<br>Ia, <i>aph</i> (3′)-IIIa, <i>tetM</i>      | -                             |
| VS3185 | Dog | <i>S. pseudintermedius</i> | Colonization            | PEN, FOX                                          | <i>mecA</i>                                                                                                     | <i>lukS/F-I</i> , <i>siet</i> |
| VS3186 | Dog | <i>S. cohnii</i>           | Colonization            | PEN                                               | <i>mecA</i>                                                                                                     | -                             |
| VS3192 | Dog | <i>S. lentus</i>           | Colonization            | PEN                                               | <i>mecA</i>                                                                                                     | -                             |

|        |     |                            |              |                        |                                                                             |                       |
|--------|-----|----------------------------|--------------|------------------------|-----------------------------------------------------------------------------|-----------------------|
| VS3196 | Dog | <i>S. pseudintermedius</i> | Colonization | PEN, FOX               | <i>mecA, blaZ</i>                                                           | <i>lukS/F-I</i>       |
| VS3198 | Dog | <i>S. pseudintermedius</i> | Colonization | PEN, FOX, CN, TOB, KAN | <i>mecA, blaZ, aac(6')-Ie-aph(2'')-Ia, aph(3')-IIIa, str</i>                | <i>lukS/F-I, siet</i> |
| VS3200 | Dog | <i>S. pseudintermedius</i> | Colonization | PEN, FOX               | <i>mecA, blaZ</i>                                                           | <i>lukS/F-I, siet</i> |
| VS3204 | Dog | <i>S. sciuri</i>           | Colonization | PEN                    | <i>blaZ, mecA</i>                                                           |                       |
| VS3206 | Dog | <i>S. pseudintermedius</i> | Colonization | PEN, FOX               | <i>mecA, blaZ</i>                                                           | <i>lukS/F-I, siet</i> |
| VS3207 | Dog | <i>S. lentus</i>           | Colonization | PEN                    | <i>mecA</i>                                                                 | -                     |
| VS3209 | Dog | <i>S. vitulinus</i>        | Colonization | PEN                    | <i>mecA</i>                                                                 | -                     |
| VS3211 | Dog | <i>S. lentus</i>           | Colonization | PEN, CN, KAN, CD, C    | <i>mecA, aac(6')-Ie-aph(2'')-Ia, aph(3')-IIIa, mphC, cat<sub>p221</sub></i> | <i>hla</i>            |
| VS3213 | Dog | <i>S. sciuri</i>           | Colonization | PEN                    | <i>mecA</i>                                                                 | -                     |
| VS3215 | Dog | <i>S. lentus</i>           | Colonization | PEN                    | <i>mecA, blaZ</i>                                                           | -                     |
| VS3216 | Dog | <i>S. lentus</i>           | Colonization | PEN                    | <i>mecA, blaZ,</i>                                                          | -                     |
| VS2985 | Owl | <i>S. epidermidis</i>      | Colonization | PEN, FD                | <i>blaZ, fusB</i>                                                           | -                     |
| VS2986 | Owl | <i>S. epidermidis</i>      | Colonization | PEN, ERY, FD           | <i>blaZ, msr(A/B), mphC, fusB</i>                                           | -                     |
| VS2987 | Owl | <i>S. sciuri</i>           | Colonization | Susceptible            | -                                                                           | -                     |
| VS2988 | Owl | <i>S. sciuri</i>           | Colonization | Susceptible            | -                                                                           | -                     |
| VS2989 | Owl | <i>S. sciuri</i>           | Colonization | PEN                    | <i>mecA</i>                                                                 | -                     |
| VS2990 | Owl | <i>S. sciuri</i>           | Colonization | PEN                    | <i>mecA</i>                                                                 | -                     |
| VS2991 | Owl | <i>S. sciuri</i>           | Colonization | PEN, CD, TET, FD       | <i>mecA, mphC, tetK</i>                                                     | -                     |
| VS2992 | Owl | <i>S. sciuri</i>           | Colonization | PEN, CD, FD            | -                                                                           | -                     |
| VS2993 | Owl | <i>S. sciuri</i>           | Colonization | PEN, FOX, CD           | <i>mecA, mphC</i>                                                           | -                     |

|        |     |                  |              |                       |                   |   |
|--------|-----|------------------|--------------|-----------------------|-------------------|---|
| VS2994 | Owl | <i>S. sciuri</i> | Colonization | PEN                   | <i>mecA</i>       | - |
| VS2995 | Owl | <i>S. sciuri</i> | Colonization | PEN, CD, FD           | -                 | - |
| VS2996 | Owl | <i>S. sciuri</i> | Colonization | Susceptible           | -                 | - |
| VS2997 | Owl | <i>S. sciuri</i> | Colonization | Susceptible           | -                 | - |
| VS2998 | Owl | <i>S. sciuri</i> | Colonization | Susceptible           | -                 | - |
| VS2999 | Owl | <i>S. sciuri</i> | Colonization | PEN, FD               | -                 | - |
| VS3000 | Owl | <i>S. sciuri</i> | Colonization | PEN, FOX, CD, FD      | <i>mecA, mphC</i> | - |
| VS3001 | Owl | <i>S. sciuri</i> | Colonization | Susceptible           | -                 | - |
| VS3002 | Owl | <i>S. sciuri</i> | Colonization | PEN                   | -                 | - |
| VS3003 | Owl | <i>S. sciuri</i> | Colonization | PEN, FD               | <i>mecA</i>       | - |
| VS3004 | Owl | <i>S. sciuri</i> | Colonization | PEN, FOX, CD, TET, FD | <i>mecA</i>       | - |
| VS3005 | Owl | <i>S. sciuri</i> | Colonization | Susceptible           | -                 | - |
| VS3006 | Owl | <i>S. sciuri</i> | Colonization | Susceptible           | -                 | - |
| VS3007 | Owl | <i>S. lentus</i> | Colonization | CD                    | <i>mphC</i>       | - |
| VS3008 | Owl | <i>S. lentus</i> | Colonization | PEN, CD, TET, FD      | <i>tetK</i>       | - |
| VS3009 | Owl | <i>S. lentus</i> | Colonization | PEN, CD, TET          | <i>tetK</i>       | - |
| VS3010 | Owl | <i>S. lentus</i> | Colonization | CD, TET               | <i>mphC</i>       | - |
| VS3011 | Owl | <i>S. lentus</i> | Colonization | Susceptible           | -                 | - |
| VS3012 | Owl | <i>S. lentus</i> | Colonization | Susceptible           | -                 | - |
| VS3013 | Owl | <i>S. lentus</i> | Colonization | TET                   | <i>tetK</i>       | - |
| VS3014 | Owl | <i>S. lentus</i> | Colonization | Susceptible           | -                 | - |

|        |                  |                         |              |                                  |                                                         |   |
|--------|------------------|-------------------------|--------------|----------------------------------|---------------------------------------------------------|---|
| VS3015 | Owl              | <i>S. lentus</i>        | Colonization | PEN, CD, FD                      | <i>mecA</i>                                             | - |
| VS3016 | Owl              | <i>S. lentus</i>        | Colonization | FD                               | -                                                       | - |
| VS3017 | Owl              | <i>S. lentus</i>        | Colonization | Susceptible                      | <i>mecA</i>                                             | - |
| VS3018 | Owl              | <i>S. vitulinus</i>     | Colonization | Susceptible                      | <i>mecA</i>                                             | - |
| VS3019 | Owl              | <i>S. vitulinus</i>     | Colonization | PEN, FD                          | <i>mecA</i>                                             | - |
| VS3020 | Owl              | <i>S. haemolyticus</i>  | Colonization | Susceptible                      | -                                                       | - |
| VS3021 | Owl              | <i>S. haemolyticus</i>  | Colonization | PEN, FOX, CIP, ERY, CD, TET, SXT | <i>mphC, msr(A/B), tetO</i>                             | - |
| VS3022 | Owl              | <i>S. saprophyticus</i> | Colonization | Susceptible                      | <i>mecA</i>                                             | - |
| VS3023 | Owl              | <i>S. xylosus</i>       | Colonization | PEN, FOX, ERY, CD, TET, C, FD    | <i>mphC, tetM, tetL</i>                                 | - |
| VS3024 | Owl              | <i>S. xylosus</i>       | Colonization | ERY                              | -                                                       | - |
| VS3025 | Owl              | <i>S. succinus</i>      | Colonization | PEN                              | -                                                       | - |
| VS3026 | Homebred chicken | <i>S. lentus</i>        | Colonization | CIP, TOB, KAN, ERY, CD, TET      | <i>ermB, aph(3')-IIIa, ant(4')-Ia, tetL</i>             | - |
| VS3027 | Homebred chicken | <i>S. lentus</i>        | Colonization | CIP, TOB, ERY, CD, TET           | <i>ermC, ant(4')-Ia, tetK</i>                           | - |
| VS3028 | Homebred chicken | <i>S. lentus</i>        | Colonization | CIP, TOB, KAN, ERY, CD, SXT      | <i>ermB, aph(3')-IIIa, ant(4')-Ia, dfrK</i>             | - |
| VS3029 | Homebred chicken | <i>S. lentus</i>        | Colonization | CIP, TOB, KAN, ERY, CD           | <i>ermC, mphC, aph(3')-IIIa, ant(4')-Ia</i>             | - |
| VS3030 | Homebred chicken | <i>S. lentus</i>        | Colonization | CIP, ERY, CD, C, SXT             | <i>ermA, ermC, mphC, dfrD, dfrK, cat<sub>p194</sub></i> | - |
| VS3031 | Homebred chicken | <i>S. lentus</i>        | Colonization | CIP, ERY, CD                     | <i>mphC</i>                                             | - |
| VS3032 | Homebred chicken | <i>S. lentus</i>        | Colonization | PEN, CIP, ERY, CD, TET           | <i>ermC, tetL</i>                                       | - |

|        |                    |                  |              |                                           |                                                                           |   |
|--------|--------------------|------------------|--------------|-------------------------------------------|---------------------------------------------------------------------------|---|
| VS3033 | Homebred chicken   | <i>S. lentus</i> | Colonization | PEN, CIP, ERY, CD, TET                    | <i>ermC, mphC, tetK</i>                                                   | - |
| VS3034 | Homebred chicken   | <i>S. lentus</i> | Colonization | PEN, TOB, KAN, ERY, CD, TET, FD           | <i>ermB, ermC, mphC, aph(3')-IIIa, ant(4')-Ia, tetL, tetK</i>             | - |
| VS3035 | Homebred chicken   | <i>S. lentus</i> | Colonization | PEN, CIP, ERY, CD                         | <i>ermC, mphC</i>                                                         | - |
| VS3036 | Homebred chicken   | <i>S. sciuri</i> | Colonization | PEN, TOB, KAN, ERY, CD, TET               | <i>ermB, aph(3')-IIIa, ant(4')-Ia, tetL, tetK</i>                         | - |
| VS3037 | Commercial chicken | <i>S. lentus</i> | Colonization | CIP, ERY, CD, TET                         | <i>mphC, tetL</i>                                                         | - |
| VS3038 | Commercial chicken | <i>S. lentus</i> | Colonization | CIP, ERY, CD, FD                          | <i>ermA, ermC, mphC</i>                                                   | - |
| VS3039 | Commercial chicken | <i>S. lentus</i> | Colonization | PEN, CIP, ERY, CD                         | <i>ermC</i>                                                               | - |
| VS3040 | Commercial chicken | <i>S. lentus</i> | Colonization | PEN, FOX, CIP, CN, TOB, KAN, ERY, CD, TET | <i>ermA, ermC, aph(3')-IIIa, tetL, tetM</i>                               | - |
| VS3041 | Commercial chicken | <i>S. lentus</i> | Colonization | PEN, FOX+D19:D21, ERY, CD, FD             | <i>ermC, mphC</i>                                                         | - |
| VS3042 | Commercial chicken | <i>S. lentus</i> | Colonization | PEN, CIP, ERY, CD                         | <i>ermA, ermC, mphC,</i>                                                  | - |
| VS3043 | Commercial chicken | <i>S. lentus</i> | Colonization | PEN, CIP, ERY, CD                         | <i>ermA, ermB, ermC, mphC</i>                                             | - |
| VS3044 | Commercial chicken | <i>S. lentus</i> | Colonization | PEN, ERY, CD                              | <i>ermC, mphC</i>                                                         | - |
| VS3045 | Commercial chicken | <i>S. lentus</i> | Colonization | PEN, ERY, CD, TET                         | <i>ermA, ermC, mphC, tetL, tetM,</i>                                      | - |
| VS3046 | Commercial chicken | <i>S. lentus</i> | Colonization | PEN, FOX, CIP, TOB, KAN, TET, C, SXT      | <i>ermA, ermC, mphC, aph(3')-IIIa, ant(4')-Ia, tetL, dfrD, dfrK, fexA</i> | - |
| VS3047 | Commercial chicken | <i>S. lentus</i> | Colonization | PEN, ERY, CD, TET                         | <i>ermC, mphC, tetL</i>                                                   | - |

|        |                    |                                          |              |                                               |                                                               |   |
|--------|--------------------|------------------------------------------|--------------|-----------------------------------------------|---------------------------------------------------------------|---|
| VS3048 | Commercial chicken | <i>S. cohnii</i> spp. <i>urealyticus</i> | Colonization | PEN, FOX, ERY, CD, TET, FD                    | <i>ermB, mphC</i>                                             | - |
| VS3049 | Commercial chicken | <i>S. cohnii</i> spp. <i>urealyticus</i> | Colonization | PEN, ERY, CD, TET                             | <i>ermA, ermC, mphC, tetL, tetM, tetK</i>                     | - |
| VS3050 | Quail              | <i>S. lentus</i>                         | Colonization | PEN, TOB, ERY, CD, TET, FD                    | <i>ermA, ermB, mphC, aph(3')-IIIa, ant(4')-Ia, tetL, tetK</i> | - |
| VS3051 | Quail              | <i>S. lentus</i>                         | Colonization | PEN, FOX, CIP, CN, TOB, KAN, ERY, CD, TET, FD | <i>ermC, mphC, str, tetK, tetO</i>                            | - |
| VS3052 | Quail              | <i>S. lentus</i>                         | Colonization | PEN, CIP, ERY, CD, TET, FD, SXT               | <i>ermC, mphC, tetL, dfrK</i>                                 | - |
| VS3053 | Quail              | <i>S. lentus</i>                         | Colonization | CIP, ERY, CD, TET, C, FD                      | <i>mecA, ermC, mphC,</i>                                      | - |
| VS3054 | Quail              | <i>S. lentus</i>                         | Colonization | PEN, CIP, ERY, CD, TET, FD                    | <i>ermC, mphC, tetK</i>                                       | - |
| VS3055 | Quail              | <i>S. lentus</i>                         | Colonization | PEN, CIP, ERY, CD, TET, FD                    | <i>ermC, mphC, tetK, tetL</i>                                 | - |
| VS3056 | Quail              | <i>S. lentus</i>                         | Colonization | PEN, CIP, ERY, CD, TET, FD                    | <i>ermC, mphC, tetK</i>                                       | - |
| VS3057 | Quail              | <i>S. lentus</i>                         | Colonization | PEN, CIP, ERY, CD, TET, C, FD, SXT            | <i>ermC, mphC, tetL, dfrK</i>                                 | - |
| VS3058 | Quail              | <i>S. lentus</i>                         | Colonization | PEN, CIP, TOB, ERY, CD, TET                   | <i>ermB, mphC, ant(4')-Ia, tetL, tetK</i>                     | - |
| VS3059 | Quail              | <i>S. lentus</i>                         | Colonization | PEN, ERY, CD, TET, FD                         | <i>ermC, tetL, tetK</i>                                       | - |
| VS3060 | Quail              | <i>S. lentus</i>                         | Colonization | PEN, CIP, TOB, ERY, CD, TET                   | <i>ermB, mphC, ant(4')-Ia, tetL, tetK</i>                     | - |
| VS3061 | Quail              | <i>S. lentus</i>                         | Colonization | PEN, TOB, ERY, CD, TET                        | <i>ermC, mphC, ant(4')-Ia, tetL, tetK</i>                     | - |
| VS3062 | Quail              | <i>S. lentus</i>                         | Colonization | PEN, TOB, KAN, ERY, CD, TET                   | <i>ermC, mphC, aph(3')-IIIa, ant(4')-Ia, tetK, tetL</i>       | - |
| VS3063 | Quail              | <i>S. lentus</i>                         | Colonization | PEN, ERY, CD, TET                             | <i>ermC, mphC, tetL, tetK</i>                                 | - |



|        |       |                                             |              |                                       |                                                              |   |
|--------|-------|---------------------------------------------|--------------|---------------------------------------|--------------------------------------------------------------|---|
| VS3064 | Quail | <i>S. lentus</i>                            | Colonization | PEN, CIP, TOB, KAN, ERY, CD, TET, SXT | <i>ermB, mphC, aph(3')-IIIa, ant(4')-Ia, str, tetL, dfrK</i> | - |
| VS3065 | Quail | <i>S. sciuri</i>                            | Colonization | PEN, TOB, ERY, CD, TET, FD            | <i>ermB, ant(4')-Ia, tetL, tetK</i>                          | - |
| VS3066 | Quail | <i>S. sciuri</i>                            | Colonization | PEN, TOB, KAN, ERY, CD, TET, FD       | <i>ermB, aph(3')-IIIa, ant(4')-Ia, tetL, tetK, tetO</i>      | - |
| VS3067 | Quail | <i>S. sciuri</i>                            | Colonization | PEN, FOX, CD, TET, FD                 | <i>tetK</i>                                                  | - |
| VS3068 | Quail | <i>S. sciuri</i>                            | Colonization | PEN, CIP, TOB, ERY, CD, TET, FD       | <i>ermC, tetL, tetK</i>                                      | - |
| VS3069 | Quail | <i>S. sciuri</i>                            | Colonization | PEN, CIP, TOB, ERY, CD, TET, FD       | <i>ermC, ant(4')-Ia, str</i>                                 | - |
| VS3070 | Quail | <i>S. sciuri</i>                            | Colonization | PEN, TOB, KAN, ERY, CD, TET, FD       | <i>ermB, mphC, ant(4')-Ia, ant(4')-Ia, tetL, tetK</i>        | - |
| VS3071 | Quail | <i>S. sciuri</i>                            | Colonization | PEN, CIP, ERY, CD, TET                | <i>ermC, mphC, tetK</i>                                      | - |
| VS3072 | Quail | <i>S. sciuri</i>                            | Colonization | PEN, FOX, ERY, CD, TET, C, FD         | <i>ermB, ermC, mphC, tetL, tetK, tetM</i>                    | - |
| VS3073 | Quail | <i>S. sciuri</i>                            | Colonization | PEN, TOB, ERY, CD, TET                | <i>ermB, mphC, ant(4')-Ia, tetL, tetK</i>                    | - |
| VS3074 | Quail | <i>S. sciuri</i>                            | Colonization | PEN, CIP, TOB, KAN, ERY, CD, TET, SXT | <i>ermC, mphC, aph(3')-IIIa, ant(4')-Ia, tetK</i>            | - |
| VS3075 | Quail | <i>S. sciuri</i>                            | Colonization | ERY, CD, TET, SXT                     | <i>ermB, mphC, tetL, dfrK</i>                                | - |
| VS3076 | Quail | <i>S. sciuri</i>                            | Colonization | PEN, FOX, ERY, CD, TET, FD            | <i>ermB, ermC, mphC, tetL, tetK, tetO, tetM</i>              | - |
| VS3077 | Quail | <i>S. sciuri</i>                            | Colonization | PEN, FOX, LNZ, ERY, CD, TET, C, FD    | <i>cfr, ermB, ermC, mphC, tetL, tetK, tetM</i>               | - |
| VS3078 | Quail | <i>S. sciuri</i>                            | Colonization | PEN, FOX, CD, TET, FD                 | <i>mphC, tetL</i>                                            | - |
| VS3079 | Quail | <i>S. cohnii</i> spp.<br><i>urealyticus</i> | Colonization | PEN, FOX, ERY, CD, TET                | <i>ermC, mphC, tetL, tetK,</i>                               | - |

|        |       |                                             |              |                                                  |                                                                |   |
|--------|-------|---------------------------------------------|--------------|--------------------------------------------------|----------------------------------------------------------------|---|
| VS3080 | Quail | <i>S. cohnii</i> spp.<br><i>urealyticus</i> | Colonization | PEN, FOX, CIP, CN, ERY,<br>CD, TET, C, FD        | <i>ermB, ermC, mphC, tetK, tetO</i>                            | - |
| VS3081 | Quail | <i>S. cohnii</i> spp.<br><i>urealyticus</i> | Colonization | PEN, FOX, CN, TOB, ERY,<br>CD, TET, FD           | <i>ermB, ermC, mphC, ant(4')-Ia,<br/>str, tetK, tetL, tetO</i> | - |
| VS3082 | Quail | <i>S. cohnii</i> spp.<br><i>urealyticus</i> | Colonization | PEN, FOX, ERY, CD, TET,<br>FD                    | <i>ermC, tetL, tetK, tetO</i>                                  | - |
| VS3083 | Quail | <i>S. cohnii</i> spp.<br><i>urealyticus</i> | Colonization | PEN, TOB, KAN, ERY, CD,<br>TET                   | <i>ermC, mphC, aph(3')-IIIa,<br/>ant(4')-Ia, tetK, tetL</i>    | - |
| VS3084 | Quail | <i>S. cohnii</i> spp.<br><i>urealyticus</i> | Colonization | PEN, FOX, ERY, CD, TET,<br>FD                    | <i>ermB, mphC, tetL, tetK, tetO,<br/>tetM</i>                  | - |
| VS3085 | Quail | <i>S. cohnii</i> spp.<br><i>urealyticus</i> | Colonization | PEN, FOX, ERY, CD, TET,<br>FD                    | <i>ermC, mphC, tetL, tetK</i>                                  | - |
| VS3086 | Quail | <i>S. cohnii</i> spp.<br><i>urealyticus</i> | Colonization | PEN, FOX, CIP, CN, TOB,<br>KAN, ERY, CD, TET, FD | <i>ermB, ermC, mphC, aph(3')-<br/>IIIa</i>                     | - |
| VS3087 | Quail | <i>S. cohnii</i> spp.<br><i>urealyticus</i> | Colonization | PEN, FOX, ERY, CD, TET,<br>FD                    | <i>ermB, ermC, mphC, tetL, tetK,<br/>tetO, tetM</i>            | - |
| VS3088 | Quail | <i>S. cohnii</i> spp.<br><i>urealyticus</i> | Colonization | PEN, FOX, ERY, CD, TET,<br>FD                    | <i>ermC, mphC, tetL, tetK, tetO</i>                            | - |
| VS3089 | Quail | <i>S. cohnii</i> spp.<br><i>urealyticus</i> | Colonization | PEN, FOX, ERY, CD, TET,<br>FD                    | <i>ermB, ermC, mphC, tetL, tetK,<br/>tetO</i>                  | - |
| VS3090 | Quail | <i>S. cohnii</i> spp.<br><i>urealyticus</i> | Colonization | PEN, FOX, CN, TOB, KAN,<br>ERY, CD, TET, FD      | <i>ermC, mphC, aph(3')-IIIa, str,<br/>tetL, tetK, tetO</i>     | - |
| VS3091 | Quail | <i>S. cohnii</i> spp.<br><i>urealyticus</i> | Colonization | PEN, FOX, ERY, CD, TET,<br>FD                    | <i>ermC, mphC, tetL, tetK, tetO</i>                            | - |
| VS3092 | Quail | <i>S. cohnii</i> spp.<br><i>urealyticus</i> | Colonization | PEN, FOX, ERY, CD, TET                           | <i>ermC, mphC</i>                                              | - |
| VS3093 | Quail | <i>S. cohnii</i> spp.<br><i>urealyticus</i> | Colonization | PEN, FOX, ERY, CD, TET,<br>FD                    | <i>ermC, tetL, tetK, tetO</i>                                  | - |
| VS3094 | Quail | <i>S. cohnii</i> spp.<br><i>urealyticus</i> | Colonization | PEN, FOX, TOB, KAN,<br>ERY, CD, TET, C, FD       | <i>ermC, aph(3')-IIIa, tetL, tetK</i>                          | - |

|        |        |                                             |              |                                                  |                                                                        |            |
|--------|--------|---------------------------------------------|--------------|--------------------------------------------------|------------------------------------------------------------------------|------------|
| VS3095 | Quail  | <i>S. cohnii</i> spp.<br><i>urealyticus</i> | Colonization | PEN, FOX, ERY, CD, TET,<br>FD                    | <i>ermC, mphC, tetL, tetK, tetO,</i><br><i>tetM</i>                    | -          |
| VS3096 | Quail  | <i>S. cohnii</i> spp.<br><i>urealyticus</i> | Colonization | PEN, FOX, TOB, KAN,<br>ERY, CD, TET, C, FD       | <i>ermC, aph(3')-IIIa, tetL, tetK,</i><br><i>tetO</i>                  | -          |
| VS3097 | Quail  | <i>S. cohnii</i> spp.<br><i>urealyticus</i> | Colonization | PEN, CIP, ERY, CD, TET,<br>FD                    | <i>ermC, tetL, tetK, tetO</i>                                          | -          |
| VS3098 | Quail  | <i>S. haemolyticus</i>                      | Colonization | PEN, CIP, TOB, TET, FD                           | <i>aph(3')-IIIa, tetL</i>                                              | -          |
| VS3099 | Quail  | <i>S. haemolyticus</i>                      | Colonization | PEN, CIP, TOB, KAN, ERY,<br>CD, TET, SXT         | <i>ermC, mphC, aph(3')-IIIa,</i><br><i>ant(4')-Ia, str, tetL, dfrK</i> | -          |
| VS3100 | Quail  | <i>S. haemolyticus</i>                      | Colonization | PEN, FOX, ERY, CD, TET,<br>FD                    | <i>ermB, ermC, mphC, tetL, tetK</i>                                    | -          |
| VS3119 | Donkey | <i>S. lentus</i>                            | Colonization | PEN, CIP, ERY, CD, TET,<br>FD                    | <i>mecA, blaZ, lnuA</i>                                                | -          |
| VS3120 | Donkey | <i>S. xylosus</i>                           | Colonization | TET                                              |                                                                        | -          |
| VS3121 | Donkey | <i>S. vitulinus</i>                         | Colonization | PEN, TET                                         | <i>mecA</i>                                                            | -          |
| VS3122 | Donkey | <i>S. sciuri</i>                            | Colonization | CN, TOB, KAN, FD                                 | <i>mecA, aph(3')-IIIa, ant(4')-Ia,</i><br><i>str</i>                   | -          |
| VS3123 | Donkey | <i>S. sciuri</i>                            | Colonization | PEN, CD, FD                                      | <i>mecA</i>                                                            | -          |
| VS3124 | Donkey | <i>S. sciuri</i>                            | Colonization | FD                                               | <i>mecA</i>                                                            | -          |
| VS3125 | Donkey | <i>S. sciuri</i>                            | Colonization | PEN, FOX, LNZ, CN, TOB,<br>KAN, ERY, CD, TET, FD | <i>mecA, aph(3')-IIIa</i>                                              | -          |
| VS3126 | Donkey | <i>S. sciuri</i>                            | Colonization | PEN, FOX, LNZ, ERY,<br>LNZ, CN, TOB, KAN, CD     | <i>mecA, optrA, ermB, aph(3')-</i><br><i>IIIa</i>                      | <i>eta</i> |
| VS3127 | Donkey | <i>S. sciuri</i>                            | Colonization | PEN, FOX, CD, FD                                 | <i>mecA</i>                                                            | -          |
| VS3128 | Donkey | <i>S. sciuri</i>                            | Colonization | PEN, CN, CD, FD                                  | <i>mecA, aph(3')-IIIa</i>                                              | -          |
| VS3130 | Donkey | <i>S. sciuri</i>                            | Colonization | Susceptible                                      |                                                                        | -          |
| VS3131 | Donkey | <i>S. sciuri</i>                            | Colonization | Susceptible                                      |                                                                        | -          |

|        |        |                       |              |                  |                                                  |                 |
|--------|--------|-----------------------|--------------|------------------|--------------------------------------------------|-----------------|
| VS3132 | Donkey | <i>S. sciuri</i>      | Colonization | Susceptible      | <i>mecA</i>                                      | -               |
| VS3133 | Donkey | <i>S. sciuri</i>      | Colonization | Susceptible      | <i>mecA</i>                                      | -               |
| VS3134 | Donkey | <i>S. sciuri</i>      | Colonization | Susceptible      | <i>mecA</i>                                      | -               |
| VS3135 | Donkey | <i>S. sciuri</i>      | Colonization | Susceptible      | <i>mecA</i>                                      | <i>hla</i>      |
| VS3136 | Donkey | <i>S. sciuri</i>      | Colonization | TET              | <i>mecA, tetK</i>                                | -               |
| VS3137 | Donkey | <i>S. sciuri</i>      | Colonization | Susceptible      | <i>mecA</i>                                      | -               |
| VS3138 | Donkey | <i>S. sciuri</i>      | Colonization | TET              | <i>mecA, aph(3')-IIIa, ant(4')-Ia, str, tetM</i> | -               |
| VS3139 | Donkey | <i>S. sciuri</i>      | Colonization | CD, FD           | <i>mecA</i>                                      | -               |
| VS3151 | Camel  | <i>S. chromogenes</i> | Colonization | PEN              | <i>mecA</i>                                      | -               |
| VS3152 | Camel  | <i>S. epidermidis</i> | Colonization | PEN              | <i>mecA</i>                                      | <i>hla, hld</i> |
| VS3153 | Camel  | <i>S. hominis</i>     | Colonization | PEN              | <i>mecA</i>                                      | -               |
| VS3154 | Camel  | <i>S. lentus</i>      | Colonization | PEN, ERY, CD     | <i>mecA, mphC</i>                                | <i>hla</i>      |
| VS3155 | Camel  | <i>S. lentus</i>      | Colonization | PEN              | <i>mecA</i>                                      | -               |
| VS3156 | Camel  | <i>S. lentus</i>      | Colonization | PEN, ERY, CD, FD | <i>mecA</i>                                      | -               |
| VS3157 | Camel  | <i>S. lentus</i>      | Colonization | PEN              | <i>mecA</i>                                      | -               |
| VS3158 | Camel  | <i>S. lentus</i>      | Colonization | PEN              | <i>mecA</i>                                      | -               |
| VS3159 | Camel  | <i>S. lentus</i>      | Colonization | PEN              | <i>mecA</i>                                      | -               |
| VS3160 | Camel  | <i>S. lentus</i>      | Colonization | PEN              | <i>mecA</i>                                      | -               |
| VS3161 | Camel  | <i>S. lentus</i>      | Colonization | PEN              | <i>mecA</i>                                      | -               |
| VS3162 | Camel  | <i>S. lentus</i>      | Colonization | PEN              | <i>mecA</i>                                      | -               |

|        |       |                   |              |             |                   |            |
|--------|-------|-------------------|--------------|-------------|-------------------|------------|
| VS3163 | Camel | <i>S. lentus</i>  | Colonization | PEN, FD     | <i>mecA</i>       | <i>hld</i> |
| VS3164 | Camel | <i>S. lentus</i>  | Colonization | PEN, FD     | <i>mecA</i>       | -          |
| VS3165 | Camel | <i>S. lentus</i>  | Colonization | PEN         | <i>mecA</i>       | -          |
| VS3166 | Camel | <i>S. lentus</i>  | Colonization | PEN         | <i>mecA, mphC</i> | -          |
| VS3167 | Camel | <i>S. sciuri</i>  | Colonization | PEN         | <i>mecA</i>       | -          |
| VS3168 | Camel | <i>S. sciuri</i>  | Colonization | PEN         | <i>mecA</i>       | -          |
| VS3169 | Camel | <i>S. sciuri</i>  | Colonization | PEN         | <i>mecA</i>       | -          |
| VS3170 | Camel | <i>S. sciuri</i>  | Colonization | PEN         | <i>mecA</i>       | -          |
| VS3171 | Camel | <i>S. sciuri</i>  | Colonization | PEN         | <i>mecA</i>       | -          |
| VS3172 | Camel | <i>S. sciuri</i>  | Colonization | PEN         | <i>mecA</i>       | -          |
| VS3173 | Camel | <i>S. sciuri</i>  | Colonization | PEN         | <i>mecA</i>       | <i>hld</i> |
| VS3174 | Camel | <i>S. sciuri</i>  | Colonization | PEN         | <i>mecA</i>       | -          |
| VS3175 | Camel | <i>S. sciuri</i>  | Colonization | PEN         | <i>mecA</i>       | -          |
| VS3176 | Camel | <i>S. sciuri</i>  | Colonization | PEN         | <i>mecA</i>       | <i>hld</i> |
| VS3177 | Camel | <i>S. sciuri</i>  | Colonization | PEN         | <i>mecA</i>       | <i>hld</i> |
| VS3178 | Camel | <i>S. sciuri</i>  | Colonization | PEN, CD, FD | <i>mecA</i>       | -          |
| VS3179 | Camel | <i>S. xylosus</i> | Colonization | PEN         | <i>mecA</i>       | -          |
| VS3180 | Camel | <i>S. xylosus</i> | Colonization | PEN         | <i>mecA</i>       | -          |
| VS3181 | Camel | <i>S. xylosus</i> | Colonization | PEN         | <i>mecA</i>       | <i>hld</i> |

Abbreviations. PEN: penicillin; CIP: ciprofloxacin; FOX: cefoxitin; CN: gentamycin; TOB: tobramycin; KAN: kanamycin; STR: streptomycin; ERY: erythromycin; CD: clindamycin; TET: tetracycline; SXT: sulfamethoxazole-trimethoprim; C: chloramphenicol.
